# 1 **A method for systematically surveying data visualizations in** 2 **infectious disease genomic epidemiology**

3  
4 Anamaria Crisan<sup>1</sup>, Jennifer L. Gardy<sup>2,3</sup>, Tamara Munzner<sup>1,\*</sup>

5  
6 <sup>1</sup> Department of Computer Science, University of British Columbia, Vancouver, British  
7 Columbia, CANADA

8 <sup>2</sup> School of Population and Public Health, University of British Columbia, Vancouver, British  
9 Columbia, CANADA

10 <sup>3</sup> British Columbia Centre for Disease Control, Vancouver, British Columbia, CANADA

11

12 Correspondence should be addressed to TM ([tmm@cs.ubc.ca](mailto:tmm@cs.ubc.ca))

13

## 14 **Abstract**

15 Data visualization is an important tool for exploring and communicating findings from genomic  
16 and health datasets. Yet, without a systematic way of understanding the design space of data  
17 visualizations, researchers do not have a clear sense of what kind of visualizations are possible,  
18 or how to distinguish between good and bad options. We have devised an approach using both  
19 literature mining and human-in-the-loop analysis to construct a visualization design space from  
20 corpus of scientific research papers. We ascertain *why* and *what* visualizations were created, and  
21 *how* they are constructed. We applied our approach to derive a Genomic Epidemiology  
22 Visualization Typology (GEViT) and operationalized our results to produce an explorable  
23 gallery of the visualization design space containing hundreds of categorized visualizations. We  
24 are the first to take such a systematic approach to visualization analysis, which can be applied by  
25 future visualization tool developers to areas that extend beyond genomic epidemiology.

## 26 **Introduction**

27 Cheaper and more accurate genomic sequencing technologies are enabling public health decision  
28 makers, from doctors to epidemiologists to researchers to policy makers, to make more informed,

29 near real-time, data-driven decisions toward pathogen diagnosis<sup>1</sup>, routine surveillance<sup>2,3</sup>, and  
30 public health interventions<sup>4</sup>. Yet as pathogen genomic data become more ubiquitous and are  
31 combined with other sources of routinely collected public health data, analysts and decision-  
32 makers are forced to confront the dimensionality challenges that attend such “big data”, with  
33 interpretability of results being chief amongst them.

34

35 Data visualization is an emergent solution to address interpretability challenges. It has been  
36 shown to improve comprehension of numerical results in medical risk communication<sup>5,6</sup>, but that  
37 context is much less complex than the heterogeneous datasets used in modern genomic  
38 epidemiology, which can include, amongst other things, genomic, patient, clinical,  
39 epidemiological, and geographic data elements. While the rise of public health genomics has  
40 been met with concrete efforts to visualize ‘omics data<sup>7</sup>, including Nextstrain<sup>8</sup> and Microreact<sup>9</sup>,  
41 few of these visualizations have been tested with target end-users to assess a visualization’s  
42 utility and usability in decision-making contexts<sup>10</sup>. What is absent is a notion of a visualization  
43 design space – the combinatorial space of visualizations that can be produced using basic  
44 graphical primitives (points, lines, areas) and aesthetic properties (position, color, size, and so on)  
45 to depict input data – and a way to systematically construct and analyze this design space to  
46 inform the design and evaluation of public health genomic data visualizations.

47

48 Design spaces are common in number of disciplines, ranging from architecture to computer  
49 science, but are absent in bioinformatics research, resulting in missed opportunities.

50 Visualization design spaces could arguably be inferred from the byproducts of search engines  
51 such as Google Image Search or PubMed Search, or more complex scholarly literature analysis

52 tools such as Semantic Scholar and SourceData<sup>11</sup>. However, the construction and exploration of  
53 a design space from these search results would require extensive additional intellectual  
54 investment. Other more explicit attempts to describe a design space exist in the form of web  
55 galleries such as SetVis<sup>12</sup>, TreeVis<sup>13</sup>, Visualizing Health(<http://www.vizhealth.org/>), or BioVis  
56 Explorer<sup>14</sup>, but while these are closer to the spirit of our definition of a design space they lack the  
57 systematicity of ours and are limited to specific subsets of possible visualizations designs. Thus,  
58 there remains the need to enable researchers, bioinformaticians, and other software tool  
59 developers to generate broad and explorable visualization design spaces.

60

61 Here we propose a systematic approach to constructing a data visualization design space by  
62 analyzing figures from the existing public health genomic research literature. Our human-in-the-  
63 loop approach blends automated algorithmic with manual curation steps that inject contextual  
64 knowledge into the design space construction process. Our approach specifically aims to  
65 systematically construct a design space that incorporates information about *why* researchers  
66 visualize data, *what* visualizations they use and *how* those visualizations are constructed, and  
67 finally to understand *how many* examples of specific data visualizations there are in our dataset.  
68 We demonstrate a concrete instantiation of this approach for a specific use case through the  
69 generation of a Genomic Epidemiology Visualization Typology (GEViT). We also provide a  
70 browsable gallery of categorized visualizations that supports exploration of the GEViT  
71 visualization design space. Our findings from GEViT itself have the most direct implications for  
72 microbial genomic research, but our approach can be applied more generally to other disciplines.  
73 We demonstrate that rigor is both desirable and achievable in data visualization design and  
74 evaluation.

## 75 **Results**

76 Our results are divided into two sections, a literature analysis and a visualization analysis. The  
77 purpose of the literature analysis was to derive an underlying structure of the document corpus in  
78 order to intelligently sample a variety of visualizations. The visualization analysis portion  
79 describes the construction of GEViT using iterative open and axial coding techniques and a  
80 descriptive quantitative analysis of the visualizations based upon GEViT. That analysis makes  
81 use of the visualization theory and terminology succinctly summarized in co-author Munzner's  
82 textbook<sup>15</sup>. A detailed overview of our methodology is provided in the Online Methods, and  
83 Supplementary Figures S1, S2, and S3. Additionally, we provide all analysis notebooks and  
84 datasets online at: <https://github.com/amcrisan/gevitAnalysisRelease>

85

## 86 **LITERATURE MINING**

### 87 **Literature mining identified article clusters according to disease pathogen**

88 We assembled a document corpus of 17,974 articles pertaining to infectious disease genomic  
89 epidemiology research published in the past 10 years (Figure 1). Using article titles and abstracts  
90 we derived topic clusters in an unsupervised manner, and classified articles as either belonging to  
91 a named topic cluster, not belonging to a cluster under current parameter settings, or never being  
92 clustered under any parameter settings (Figure 2a, also see Online Methods). Articles that never  
93 formed part of a cluster were removed from further analysis, leaving 15,315 documents of which  
94 11,416 (75% of the initial document corpus) formed 32 topic clusters (Figure 2b). Clusters were  
95 assigned topics via the top two most frequent terms within the cluster, revealing that infectious  
96 disease genomic epidemiology literature is primarily structured around pathogens. We validated  
97 our results by comparing our automatically derived cluster naming to the distribution of

98 pathogen terms from an external list (Table S1, Figure 2c), and found there to be a strong  
99 correspondence between the automatically derived cluster topics and the propensity for pathogen  
100 terms to appear within clusters of the same name (for example, the term “*Influenza Virus*” occurs  
101 primarily within the “influenza-viru” cluster). Some notable exceptions are *Escherichia coli*,  
102 *Helicobacter pylori*, and *Human Immunodeficiency Virus*, which spread across more clusters in  
103 addition to having their own defined cluster; they frequently co-occur with other infections. We  
104 also found that clusters with more generic names (for example “viru-sequenc”, or “geno-  
105 sequenc”) contain pathogens that likely had too few articles to form their clusters, possibly  
106 because they are part of more recent outbreaks (i.e., Zika, Ebola), while pathogens that tend to be  
107 more consistently studied (i.e. *Mycobacterium tuberculosis*, *Influenza Virus*) and hence have  
108 more articles tend to form their own clusters. While t-SNE based results (see online methods)  
109 should be interpreted cautiously with respect to proximity and cluster density, we found the  
110 trends in the literature analysis were well matched to domain knowledge. We filtered the corpus  
111 by limiting to pathogens with 40 or more articles, resulting in 6,350 articles within 35 pathogen  
112 clusters, then further simplified to 18 clusters: a final set of 17 pathogen clusters that had 100 or  
113 more documents and one “other” cluster.

114

### 115 **Linking pathogens to *a priori* concepts**

116 The findings from the literature mining were at odds with our own *a priori* assumptions that  
117 articles would cluster according to more general concepts, for example drug resistance,  
118 surveillance, outbreak responses, and so on, which cross-cut all pathogens. We chose to link the  
119 data-driven pathogen clusters to these *a priori* concepts because we envision this taxonomy  
120 being used by people specifically interested in them. We did so by analyzing bigrams that

121 occurred within and between pathogen topic clusters, and manually annotating those bigrams to  
122 map to some *a priori* concept; for example, the bigram “vancomycin resistance” was mapped to  
123 concept of “drug resistance” (Table S2). We mapped a total of 23 *a priori* concepts to 404  
124 bigrams, categorized into three groups: genomic concepts (drug resistance, genome, genotype,  
125 molecular biology, pathogen characterization, phylogeny, and population diversity);  
126 epidemiology concepts (clusters, disease reservoirs, geography, outbreaks (international,  
127 community, hospital), surveillance, transmission, vaccine, and vectors), and medical concepts  
128 (clinical, cancer, diagnosis, outcome, and treatment). Some bigrams were not mapped to *a priori*  
129 *concepts*, often because they were standard technical writing phrases (e.g. “statistically  
130 significant”, “data show”). *A priori* concepts did not occur uniformly across pathogen clusters  
131 (Figure S4A) and a variable number of bigrams mapped to individual *a priori* concepts, with 143  
132 bigrams mapped to “drug resistance” and only one bigram mapped to “disease reservoirs” and  
133 topic clusters (Figure S4B).

134

### 135 **Document sampling was stratified according to pathogen and *a priori* concepts**

136 We then performed two rounds of stratified sampling using pathogens and *a priori* concepts as  
137 strata. The sampling resulted in 204 unique articles to which we manually added 17 additional  
138 articles that we deemed contained interesting data visualizations (these are clearly tagged in our  
139 analysis), for a total of 221 articles (Table S3) from which we extracted a total of 770 figures,  
140 including a small number (45) of ‘missed opportunity’ tables.

141

142

143

## 144 **VISUALIZATION ANALYSIS**

145

### 146 **Developing GEViT – A Genomic Epidemiology Visualization Typology**

147 Using the analysis set of harvested figures, we used iterative open and axial coding techniques to  
148 devise a systematic way to describe how data visualizations are constructed. For analysis, we  
149 used whole figures and **did not** split them up into smaller parts. We began by classifying the  
150 types of charts in figures, further evolving to also classifying how charts were combined, and  
151 finally we also classified how charts were enhanced. We found that these three descriptive axes  
152 allowed us to sufficiently describe all visualizations in our dataset (see Online Methods for  
153 detailed sufficiency criteria). For each of these descriptive axes we also derived a controlled  
154 vocabulary (taxonomy). Collectively, we refer to this result of the descriptive axes and their  
155 associated taxonomies as GEViT (Genomic Epidemiology Visualization Typology). Below, we  
156 describe each of GEViT's descriptive axes and interleave descriptive statistics to show the  
157 distribution of taxonomic codes across these axes to provide an overview of the visualization  
158 design space. We also operationalized our analysis to produce a browsable gallery  
159 (<https://gevit.net>) that allows others to explore this GEViT design space through the classified  
160 figures (including their captions), where each figure is linked back to the original PubMed  
161 articles.

162

163 **Chart Types in GEViT.** We identified seven classes of chart types that form the basis of the  
164 data visualizations in our dataset (Figure 3): Common Statistical; Area; Relational; Temporal;  
165 Spatial; Tree; and Genomic. We compiled a taxonomy of common chart names to classify  
166 specific instances of chart types with each class. When applicable, we also defined special cases

167 of a specific chart; for example, epidemic curves are a special case of bar chart. We also defined  
168 one ‘Other’ category, which included entities that accompanied data visualizations but were not  
169 themselves data visualizations, such as tables and images, and miscellaneous visualizations that  
170 did not fit elsewhere. In total we observed 23 distinct chart types (plus one miscellaneous  
171 category), and found that the most commonly occurring types within data visualizations included  
172 Phylogenetic Trees (17.7% of all data visualizations, although some type of tree was present in  
173 23.7% of all visualizations), followed by Tables (9.7%), Bar Charts (8.9%), Genomic Maps  
174 (6.9%), Line Charts(6.8%), and Images (5.7%, typically a Gel Image of Pulsed Field Gel  
175 Electrophoresis). See Figure S5 for the occurrence of all chart types. The pervasive presence of  
176 tables, either alone or in combination with some other chart types, is a notable finding since it  
177 indicates missed opportunities for visualization.

178

179 **Chart Combinations in GEViT.** Although the majority of figures were composed of a single  
180 chart type (40.1%), there were distinct and common patterns of combining chart types to create  
181 more complex, and often linked, multi-part figures (Figure 4). Composite charts (20.3%)  
182 contained multiple chart types that were spatially aligned – for example, a heatmap and tree  
183 (dendrogram) that are spatially aligned to indicate both a hierarchical clustering and the  
184 underlying data for the clustering. A tree and heatmap can also be visualized independently of  
185 each other, but their combined value is evidently relevant for many researchers. Small Multiples  
186 (17.3%) showed different aspects of the data through multiple instances of the same chart type.  
187 Many Types Linked combinations (13.5%) used multiple different chart types that were visually  
188 linked, for example using a common color to denote some property of the data across the  
189 different charts, but not spatially aligned (in contrast to Composite charts). Finally, Many Types



190 General combinations (8.8%) describe a data visualization in which there are multiple chart types,  
191 and there does not appear to be any sort of spatial or visual link between them. This situation  
192 often arises when authors put many unrelated charts into a single figure due to space restrictions.  
193 It was not always straightforward to distinguish between some instances of Many Types Linked  
194 and Many Types General, and in such cases we resolved the ambiguity in favor of the latter  
195 classification. We also observed instances of Complex Combinations (11.9%) that developed  
196 data visualizations using two of the previously describes types of chart combinations. It was  
197 notable that trees were mostly commonly combined with other chart types.

198

199 **Chart Enhancements in GEViT.** Lastly, we noted that standard chart types were often  
200 enhanced to add metadata through the addition or changing of graphical marks - the basic  
201 graphical element corresponding to a data record (*e.g.* a patient), or derived data value (*e.g.* the  
202 total number of patients). Basic marks are points, lines, areas, and (perhaps surprisingly) text,  
203 which are endowed with aesthetic properties of size, shape, color, and texture that can be  
204 modified to encode data (Figure 5a). For example, a phylogenetic tree encodes evolutionary  
205 relationships inferred from DNA data (among other sources) as lines of some calculated length  
206 that are precisely positioned in space (Figure 5b). By default, the lines of a phylogenetic tree are  
207 often black, however those lines can be *re-encoded* to incorporate data from some additional  
208 source – for example, coloring lines according to geographic regions. Instead of re-encoding a  
209 mark, it is also possible to *add marks* to the base chart type, for example, adding colored point  
210 marks to a tree’s leaf positions (Figure 5b), or to add linear brackets and text to delineate groups  
211 (the most common reason text and lines with bracket shapes are used in our corpus). We did not

212 consider axis text, titles, or data labels to be added marks, subsuming them as constituent parts of  
213 the base chart type.

214

215 It is also possible to add more complex types of marks, which are specific instances of the basic  
216 marks types presented in Figure 5a. Connection marks are a specific instance of line marks that  
217 *connect* two other marks. Containment marks are a specific instance of area marks that enclose  
218 other marks. Finally, a glyph is a complex mark that could itself be a type of chart, but that is  
219 smaller than the base chart type and embedded within it (in contrast, we define that composite  
220 chart types have the same frame size and one chart is not embedded within the other). The only  
221 glyph we identified within our dataset was a pie chart, which was often added to geographic  
222 maps or node-link graphs (Figure 5b) to denote proportion variability in the data.

223

224 We differentiate between the instances when chart enhancements are added consistently, or just  
225 as one-off marks. When the addition or re-encoding of marks is applied consistently to the base  
226 chart type, for example re-encoding all or many lines in a tree, or adding points to all or many  
227 leaf nodes, we defined these as structured enhancements. Adding one-off marks, even if they are  
228 driven by the data or the addition of some arbitrary ink, was considered to be an annotation and  
229 defined as an unstructured enhancement. It was not always easy to differentiate between  
230 structured and unstructured enhancements, and in such cases we resolved ambiguities by  
231 choosing structured enhancement when analyzing figures.

232

233 In our dataset we observed that most figures were enhanced (83.8% of all chart types), typically  
234 through the addition of lines, points, or text (59.6%) while re-encoding of marks was less

235 common (45.6%). The use of text as a graphical mark with aesthetic properties that can be  
236 manipulated to convey information was common in our dataset, either by adding text marks to a  
237 base chart type, or re-encoding of text labels by manipulating the font face. The text itself ranged  
238 from the very simple case of a single letter or number, to a full word, to a complex concatenated  
239 string of metadata such as specimen ID, location, and year. Annotations were also less common  
240 (33.6%), and were most commonly an arrow to text, or a containment mark that highlighted only  
241 a single group.

## 242 **Discussion**

243 Data visualization is an increasingly important analytic tool for exploring and communicating  
244 results from large genomic and health datasets, but efforts to harness its potential power are  
245 impeded when visualization creators make *ad hoc* choices rather than systematically consider  
246 visualization design alternatives. While we found some instances of quite impressive and well  
247 thought out data visualizations, the systematic nature of our GEViT design space construction  
248 allowed us to assess the considerable variability of visualization design quality and revealed the  
249 unexplored potential within the design space. GEViT presents a higher level of abstraction than  
250 the existing grammar of graphics proposed by Wilkinson<sup>16</sup> and famously instantiated by  
251 Wickham<sup>17</sup> in the R tidyverse, yet is developed in the same spirit of standardizing, generalizing,  
252 and simplifying the construction of data visualizations from individual components. We found  
253 this high level of abstraction to be useful for exploring design spaces, while lower level  
254 abstractions are needed for implementation. Software tools designed with awareness of the  
255 visualization design space for genomic epidemiology could better support figure creators to  
256 make reasoned and informed choices and to avoid the *ad hoc* random walk through the set of  
257 possibilities. Compared to the robust and systematic use of statistical techniques in genomic

258 epidemiology, there is far to go before genomic epidemiology data visualization becomes truly  
259 mature.

260

261 Delineating a design space, as we have done through GEViT, is just a first step; the obvious next  
262 step is to provide robust guidance on good or bad practice in a way that is more targeted to the  
263 genomic epidemiology than the existing general visualization literature. Even this first step of  
264 establishing the design space shows gaps that require attention and provides design alternatives  
265 against which future researchers and practitioners could test and calibrate any new solutions. We  
266 emphasize the importance of using empirical studies of visualizations, with multiple design  
267 alternatives, in order to triangulate optimal design patterns for different contexts and tasks.

268

269 Two notable findings pertain to missed opportunities involving text: the pervasive use of tables  
270 (often combined with other chart types) where visualization could have been used but was not,  
271 and the practice of encoding information with aesthetic properties such as color and size applied  
272 to long text string labels. The visualization literature discourages the use of text as a mark type  
273 because reading text imposes cognitive load, whereas the goal of using aesthetic properties to  
274 encode information is to support purely perceptual processing<sup>15</sup>. We suspect that the widespread  
275 use of text marks in this hybrid way stems from an incomplete knowledge of the design space  
276 and the lack of tools to support the visualization of complex and heterogenous data.

277 Showing raw data through text also compounds another notable tendency of these visualizations  
278 to show all data records, which limits their scalability. An under-explored alternative would be to  
279 visually summarize the data at multiple levels of detail. Another finding was the pervasiveness of  
280 phylogenetic trees. Although few researchers in genomic epidemiology would consider this

281 finding surprising, we note that our own prior work suggested that phylogenetic tree  
282 visualizations have unclear utility for clinical and public health stakeholders<sup>18</sup>. Perhaps the  
283 convention of showing them routinely in a genomics research context has prevented the  
284 community from seeing the forest for the trees, so to speak. Further innovation in visualization  
285 design may result in different default choices.

286 We have presented an approach to systematically develop an explorable visualization design  
287 space through a human-in-the-analysis-loop model that exploits the strengths of both automatic  
288 processing for speed and low effort, and manual curation where human judgment is harnessed to  
289 integrate data-driven insights with human expertise. The exploratory rather than confirmatory  
290 nature of our study is both its strength and its primary limitation. While we have made all of our  
291 intermediate analysis outputs available in the spirit of transparency, the qualitative manual  
292 analysis phase are unlikely to yield identical results if undertaken by a different researcher.

293 Although our approach will surely benefit from ongoing innovations in image recognition,  
294 machine learning, and natural language processing, we argue that attempting to fully automate  
295 the entire process would be premature. Developing a faster process that still provides a way to  
296 include a human in the analysis loop will be fruitful future work for us.

297

298 There are many other ways that our resulting design space could be explored, and for brevity we  
299 have only touched upon a few selected findings. Nevertheless, these results have allowed us to  
300 appreciate the expressiveness of visualization designs in infectious disease genomic  
301 epidemiology. Our results provide guidance to both software tool developers, including  
302 bioinformaticians, and to researchers engaged with creating their own visualizations: we provide  
303 a concrete terminology for describing data visualizations, and a source of inspiration through the

304 exploration of a design space. Most importantly, our work demonstrates that it is possible to  
305 think systematically and rigorously about data visualizations and that there exist open, complex,  
306 interesting, and impactful problems in visualization design and analysis.

307

### 308 **Online Methods**

309 *See Online Methods Document*

310

### 311 **Acknowledgements**

312 The authors appreciate discussions with the InfoVis Group at the University of British Columbia  
313 and the Bedford lab at the Fred Hutch Institute. The authors would also like to acknowledge their  
314 funding sources. AC is supported by a CIHR Vanier Scholarship, JG by the Canada Research  
315 Chairs Program and a Michael Smith Foundation for Health Research Scholar award, and TM by  
316 the NSERC Discovery Program.

317

### 318 **Author Contributions**

319 AC, JG, and TM devised and interpreted the analysis and jointly wrote the paper.

320

### 321 **Competing Interests Statements**

322 The authors declare no competing interests.

323

### 324 **References**

325

- 326 1. Pankhurst, L. J. *et al.* Rapid, comprehensive, and affordable mycobacterial diagnosis with  
327 whole-genome sequencing: A prospective study. *Lancet Respir. Med.* **4**, 49–58 (2016).
- 328 2. Faria, N. R. *et al.* Mobile real-time surveillance of Zika virus in Brazil. *Genome Med.* **8**,  
329 97 (2016).
- 330 3. Quick, J. *et al.* Real-time, portable genome sequencing for Ebola surveillance. *Nature* **530**,  
331 228–32 (2016).
- 332 4. Bradley, P. *et al.* Rapid antibiotic-resistance predictions from genome sequence data for  
333 *Staphylococcus aureus* and *Mycobacterium tuberculosis*. *Nat. Commun.* **6**, 10063 (2015).
- 334 5. Zipkin, D. A. *et al.* Evidence-based risk communication: A systematic review. *Annals of*  
335 *Internal Medicine* **161**, 270–280 (2014).
- 336 6. Ancker, J. S. & Kaufman, D. Rethinking Health Numeracy: A Multidisciplinary Literature  
337 Review. *J. Am. Med. Informatics Assoc.* **14**, 713–721 (2007).
- 338 7. Gehlenborg, N. *et al.* Visualization of omics data for systems biology. *Nat. Methods* **7**,

- 339 S56--68 (2010).
- 340 8. Hadfield, J. *et al.* Nextstrain: real-time tracking of pathogen evolution. *bioRxiv* (2017).
- 341 9. Argimón, S. *et al.* Microreact: visualizing and sharing data for genomic epidemiology and  
342 phylogeography. *Microb. Genomics* (2016). doi:10.1099/mgen.0.000093
- 343 10. Carroll, L. N. *et al.* Visualization and analytics tools for infectious disease epidemiology:  
344 A systematic review. *J. Biomed. Inform.* **51**, 287–298 (2014).
- 345 11. Liechti, R. *et al.* SourceData: A semantic platform for curating and searching figures.  
346 *Nature Methods* **14**, 1021–1022 (2017).
- 347 12. Alsallakh, B. *et al.* Visualizing Sets and Set-typed Data: State-of-the-Art and Future  
348 Challenges. in *Eurographics conference on Visualization (EuroVis)– State of The Art*  
349 *Reports* 1–21 (2014). doi:10.2312/eurovisstar.20141170
- 350 13. Schulz, H. J. Treevis.net: A tree visualization reference. *IEEE Comput. Graph. Appl.* **31**,  
351 11–15 (2011).
- 352 14. Kerren, A., Kucher, K., Li, Y.-F. & Schreiber, F. BioVis Explorer: A visual guide for  
353 biological data visualization techniques. *PLoS One* **12**, e0187341 (2017).
- 354 15. Munzner, T. *Visualization Analysis and Design*. (CRC Press, 2014).
- 355 16. Wilkinson, L. The grammar of graphics. *Wiley Interdisciplinary Reviews: Computational*  
356 *Statistics* **2**, 673–677 (2010).
- 357 17. Wickham, H. A layered grammar of graphics. *J. Comput. Graph. Stat.* **19**, 3–28 (2010).
- 358 18. Crisan, A., McKee, G., Munzner, T. & Gardy, J. L. Evidence-based design and evaluation  
359 of a whole genome sequencing clinical report for the reference microbiology laboratory.  
360 *PeerJ* **2018**, (2018).
- 361 19. Meirelles, I. *Design for Information: An Introduction to the Histories, Theories, and Best*  
362 *Practices Behind Effective Information Visualizations*. (Rockport Publishers, 2013).
- 363 20. Bertin, J. *Semiology of graphics: diagrams, networks, maps. Components* (1983).  
364 doi:10.1037/023518  
365  
366

## 367 **FIGURE LEGENDS**

368  
369 **Figure 1 Summary of literature analysis steps and document sampling.**

370 **Figure 2 Summary of literature analysis results. a)** Documents were classified according to  
371 whether they were part of a cluster (green), unclustered under current parameter settings (purple),  
372 or never formed part of cluster (orange). The 32 cluster boundaries were automatically  
373 determined and are shown as light grey ovals. **b)** Clustered documents and their topics, which are  
374 automatically assigned based upon top two terms with the cluster. **c)** Verification of cluster  
375 topics against an external list of pathogens. The small multiples show the distribution across the

376 clusters of the pathogen named in the panel header, for the 35 pathogens with 40 or more  
377 matching documents.

378

379 **Figure 3 Chart Types in GEViT.** We used common names for chart types and also separated  
380 them into seven main classes and also one Other class. Special cases of chart types were defined  
381 only when there were multiple instance of the same specific chart across our dataset. Chart types  
382 with an asterisk mark (\*) indicate that they are included in the analysis through manually added  
383 articles.

384

385 **Figure 4 Chart Combinations in GEViT.** The six combination types differ based on the  
386 number of chart types, the number of charts, and the approach to linking them together.

387

388 **Figure 5 Chart Enhancements in GEViT.** a) Our characterization of marks and their  
389 associated aesthetics properties is based on longstanding conventions in the visualization  
390 literature<sup>15,19</sup> with roots in Bertin's *Semiology of Graphics*<sup>20</sup>. Illustrative examples are shown for  
391 b) a tree and c) node-link chart types

392

393 **Figure 6. GEViT Gallery.** A screen shot of the resulting GEViT gallery, available online at:  
394 <http://gevit.net>. Images in the GEViT gallery are intentionally blurred for this publication. The  
395 GEViT gallery provides links back to the original source publication and presents the images  
396 under fair use copyright terms.

397

398



**Figure 1 Summary of literature analysis steps and document sampling.**

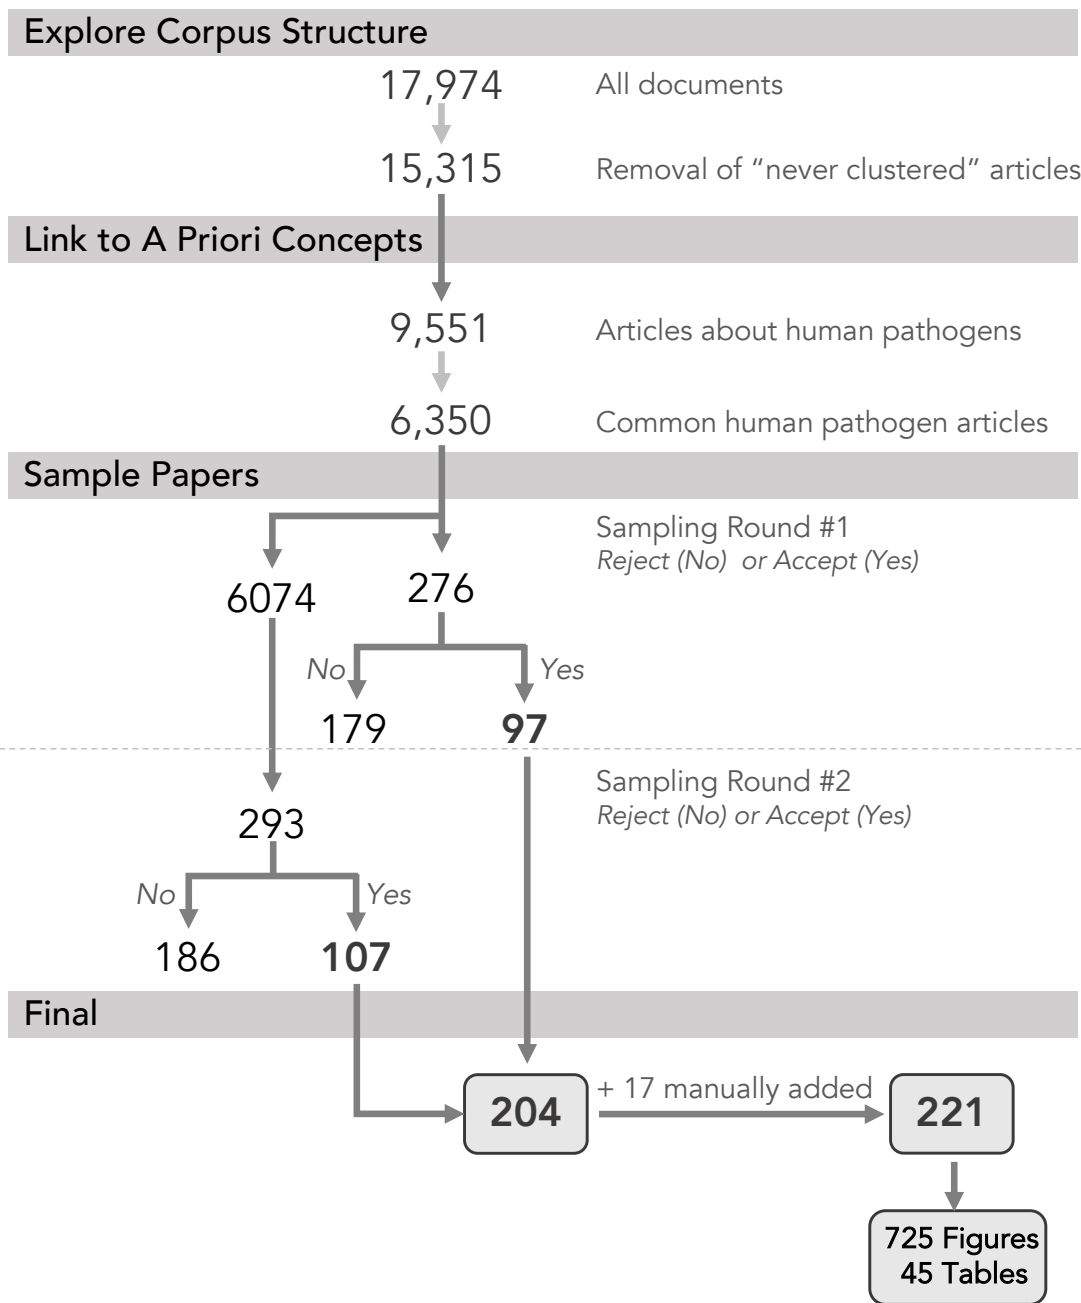

**Figure 2 Summary of literature analysis results.** **a)** Documents were classified according to whether they were part of a cluster (green), unclustered under current parameter settings (purple), or never formed part of cluster (orange). The 32 cluster boundaries were automatically determined and are shown as light grey ovals. **b)** Clustered documents and their topics, which are automatically assigned based upon top two terms with the cluster. **c)** Verification of cluster topics against an external list of pathogens. The small multiples show the distribution across the clusters of the pathogen named in the panel header, for the 35 pathogens with 40 or more matching documents.

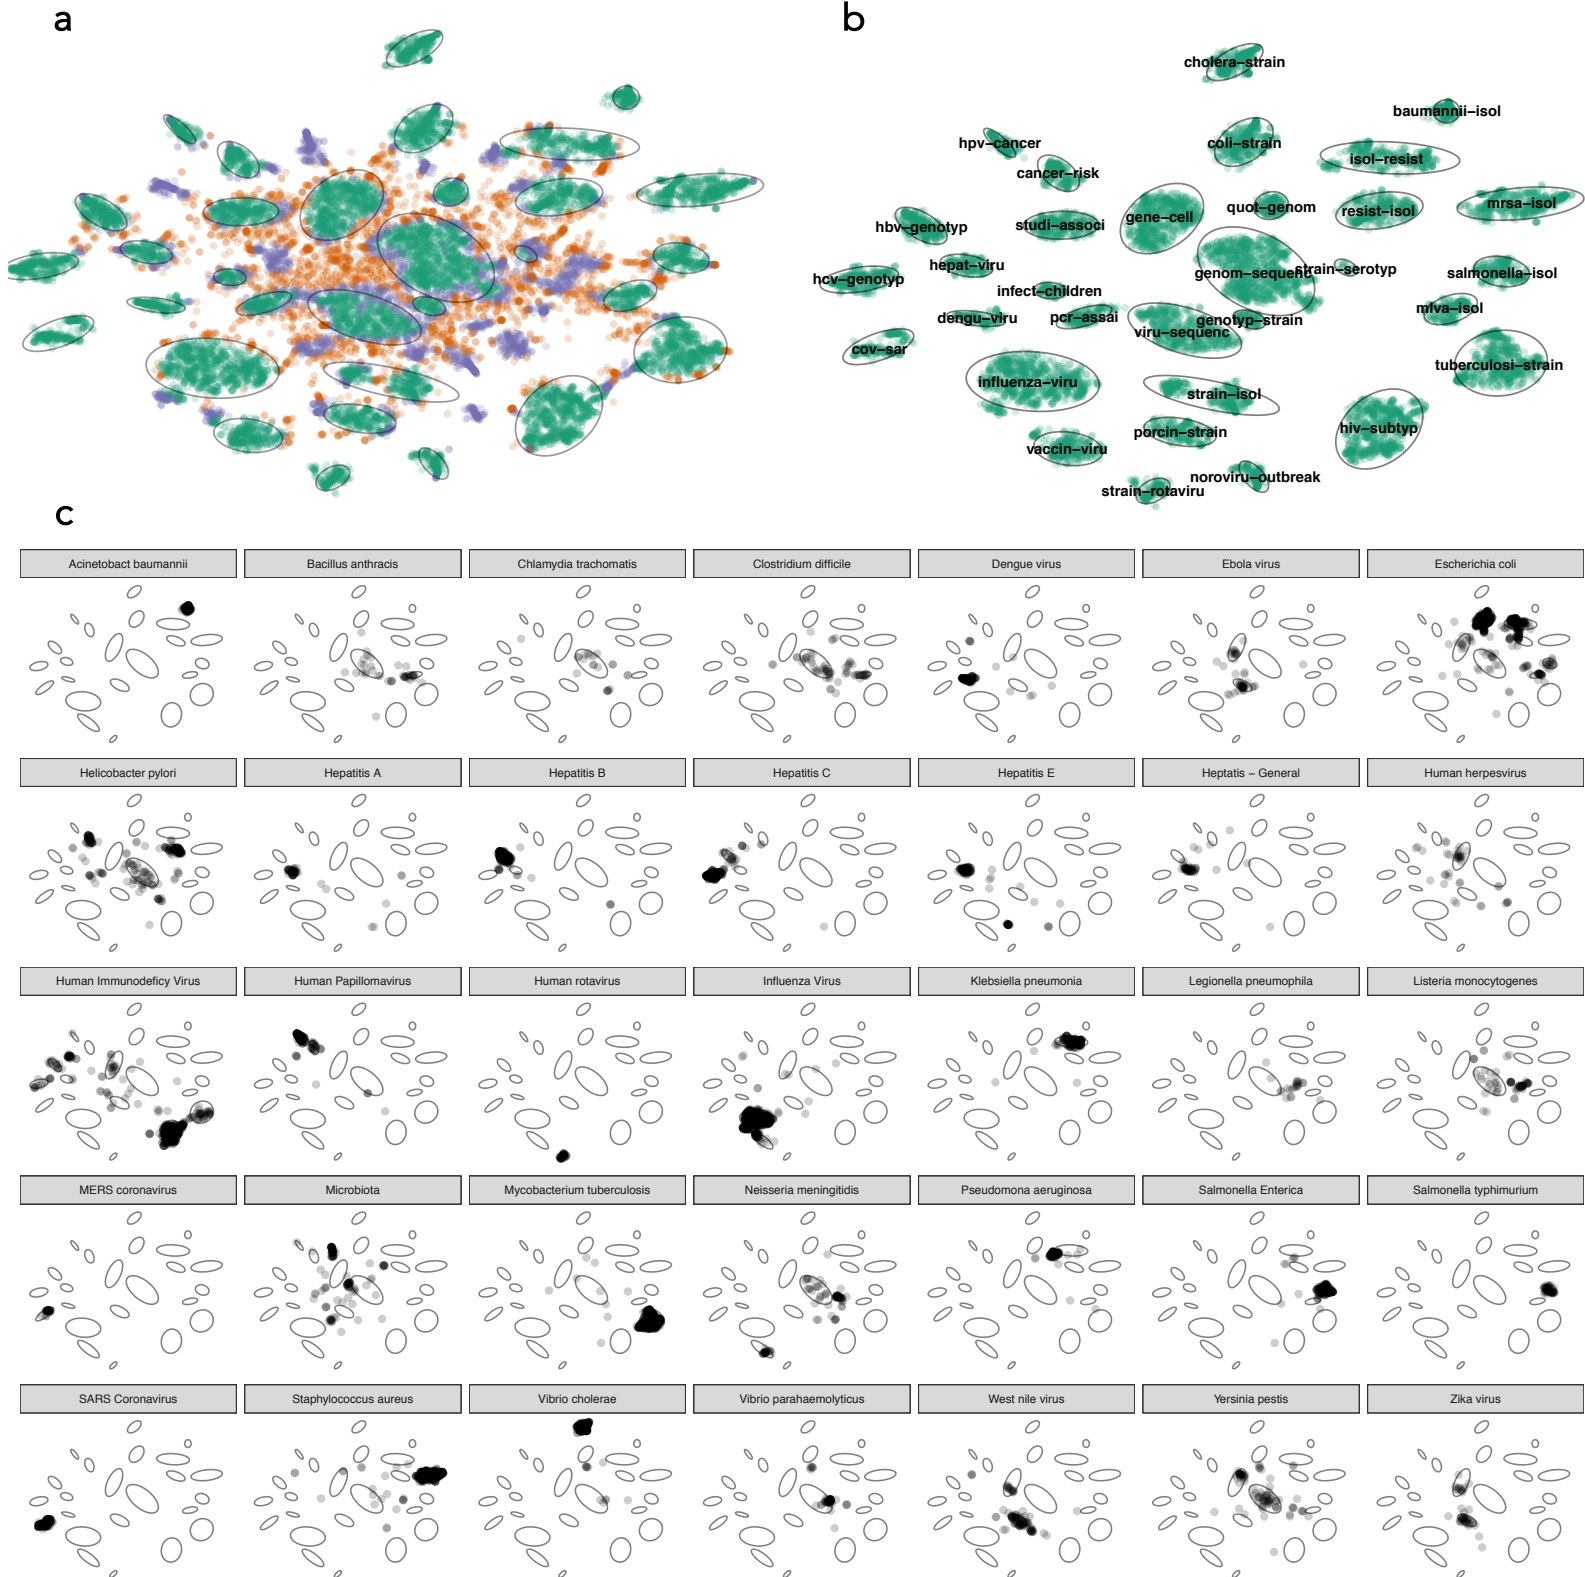

**Figure 3 Chart Types in GEViT.** We used common names for chart types and also separated them into seven main classes and also one Other class. Special cases of chart types were defined only when there were multiple instance of the same specific chart across our dataset. Chart types with an asterisks mark (\*) indicate that they are included in the analysis through manually added articles.

### Common Statistical Charts

#### Bar Chart

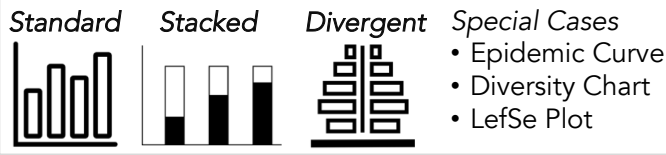

#### Line Chart

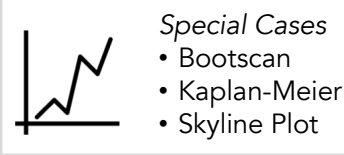

#### Scatter Plot

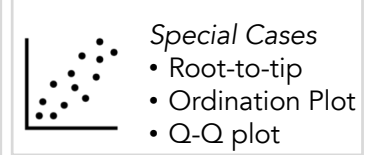

#### Pie Chart

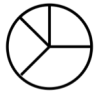

#### Venn Diagram

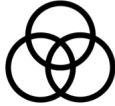

#### Timeline

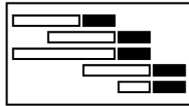

#### Distribution Plot

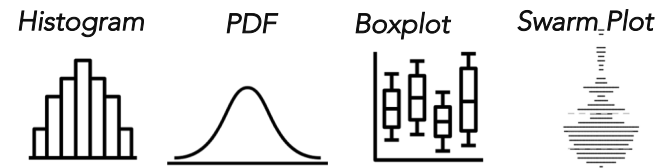

### Relational Charts

#### Node-link

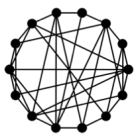

- Special Cases*
- eBurst
  - Social network
  - Molecular network
  - Minimum Spanning Tree

### Area Charts

#### Streamgraph\*

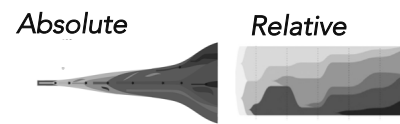

#### Heatmap

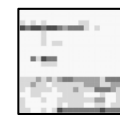

#### Density Plot\*

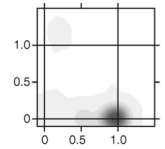

#### Flow Diagram

#### Chord Diagram

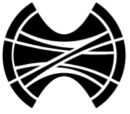

#### Sankey Diagram

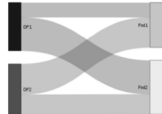

### Spatial Charts

#### Geographic Map

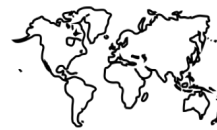

#### Choropleth Map

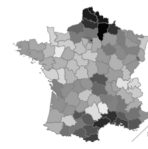

#### Interior Map

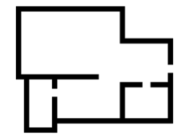

### Tree Charts

#### Phylogenetic Tree

#### *Rooted (Radial & Linear)*

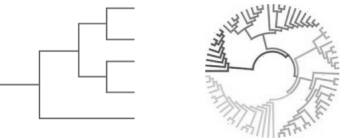

#### Dendrogram

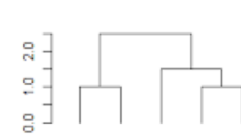

#### *Unrooted (Radial & Linear)*

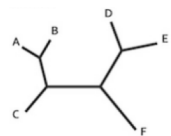

#### Clonal Tree\*

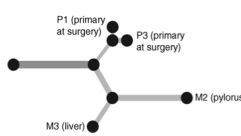

### Genomic Charts

#### Genomic Map

#### *Linear* *Radial*

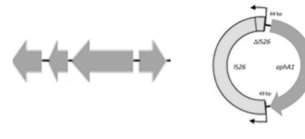

#### Alignment

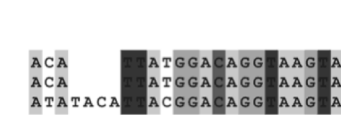

#### Composition Plot

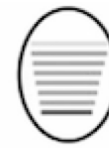

#### Sequence Logo Plot

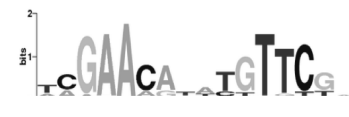

### Other Charts

#### Table

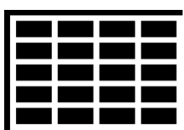

#### Category Stripe

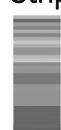

#### Image Gel Image

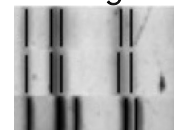

#### General Image

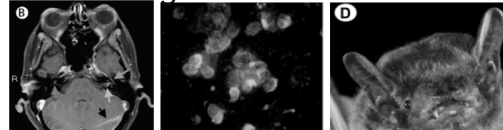

#### Miscellany

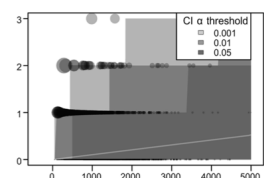

**Figure 4 Chart Combinations in GEViT.** The six combination types differ based on the number of chart types, the number of charts, and the approach to linking them together.

| Combination Type          | # of chart types | # of charts | Linkage type            | Example                                                                                                                                                                                                                                                            |
|---------------------------|------------------|-------------|-------------------------|--------------------------------------------------------------------------------------------------------------------------------------------------------------------------------------------------------------------------------------------------------------------|
| Simple                    | 1                | 1           | NA                      |  OR  OR    |
| Composite                 | Many             | 1           | Spatially Aligned       |  AND  =    |
| Small Multiples           | 1                | Many        | Chart Type & Data       |  AND  AND  |
| Many Types <i>Linked</i>  | Many             | Many        | Visual, but not spatial |  AND  AND  |
| Many Types <i>General</i> | Many             | Many        | NA                      |  AND  AND  |
| Complex Combinations      | Many             | Many        | Context dependent       |  AND  AND  |

**Figure 5 Chart Enhancements in GEViT.** a) Our characterization of marks and their associated aesthetics properties is based on longstanding conventions in the visualization literature<sup>15,19</sup> with roots in Bertin's *Semiology of Graphics*<sup>20</sup>. Illustrative examples are shown for b) a tree and c) node-link chart types

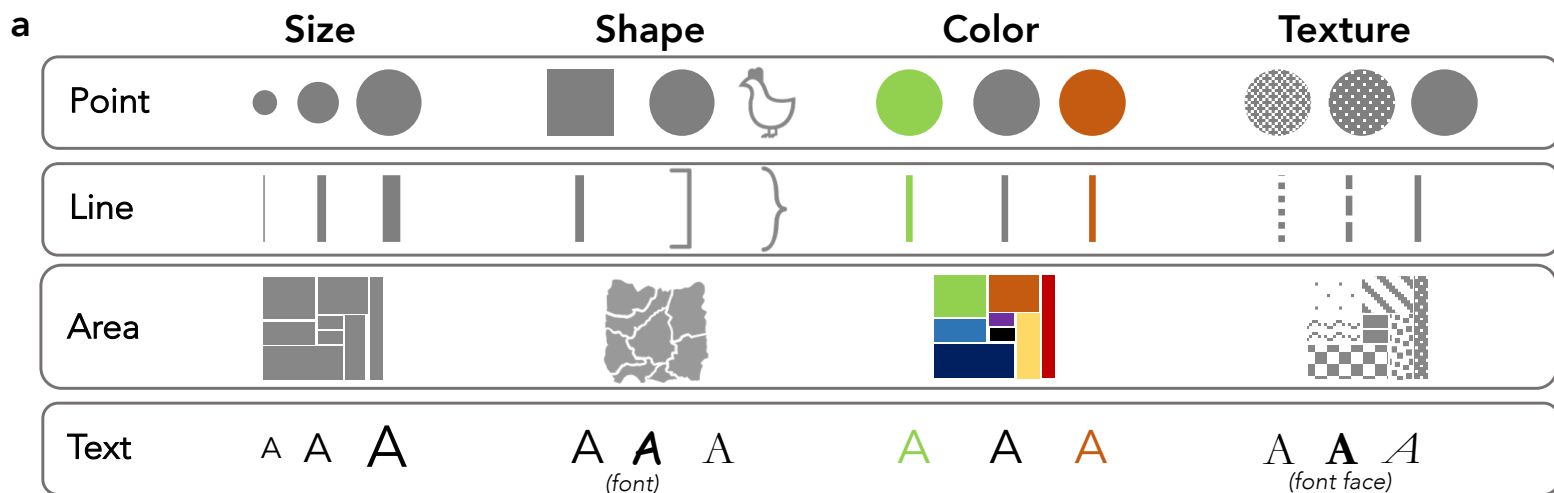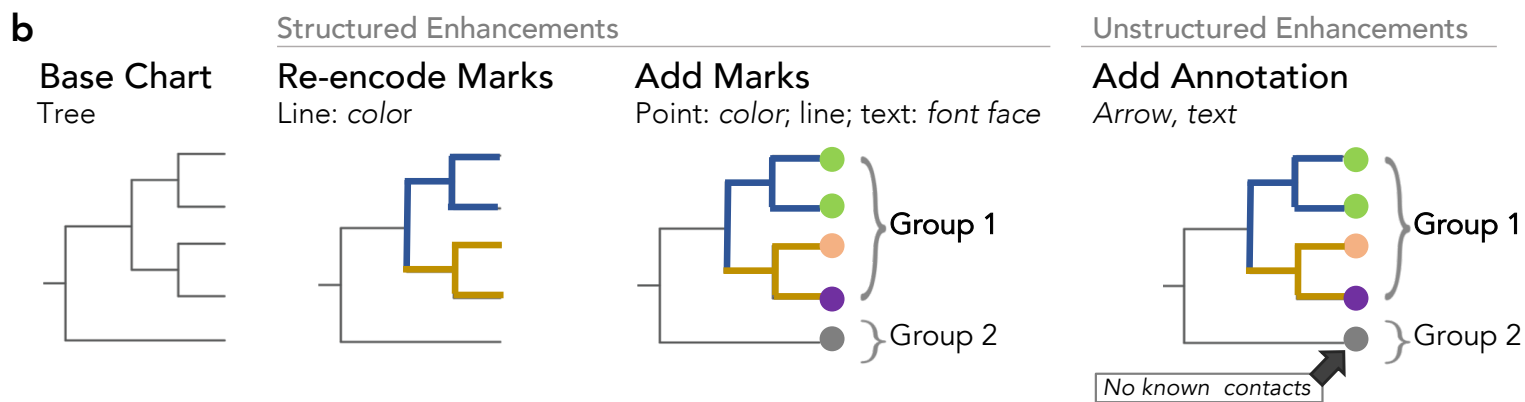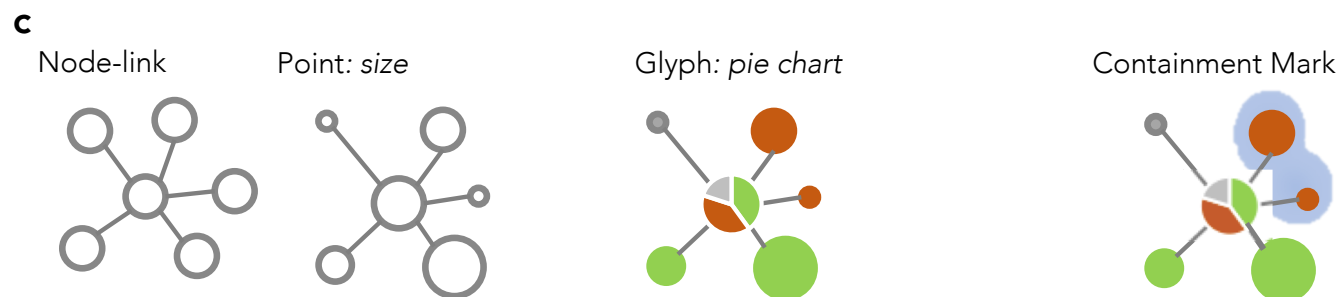

**Figure 6. GEViT Gallery.** A screen shot of the resulting GEViT gallery, available online at: <http://gevit.net>. Images in the GEViT gallery are intentionally blurred for this publication. The GEViT gallery provides links back to the original source publication and presents the images under fair use copyright terms.

The screenshot displays the GEViT Gallery interface. On the left is a sidebar with a 'Hide Disclaimer' button, a disclaimer paragraph, a 'Paper Lookup (PMID):' search box, and two 'Show' buttons for 'Visualization Context' and 'Visualization Graphical Properties'. The main content area has a 'Catalogue' and 'Figure' tab, a yellow status bar indicating '1% of figures shown (5 out of 770 figures)', and filter buttons for 'Missed Opportunity' and 'Good Practice'. Below these are three blurred figure thumbnails: one labeled 'Missed Opportunity' and two labeled 'Good Practice'.

1 Online Methods for  
2

3 **A method for systematically surveying data visualizations**  
4 **in infectious disease genomic epidemiology**

5 Anamaria Crisan, Jennifer Gardy, and Tamara Munzner  
6

7 As with the presentation of the results, the methods are split up into the literature mining and  
8 visualization analysis phases. A detailed step-by-step overview of our methods are also shown in  
9 supplemental Figures S2 and S3. Our analysis notebooks, data, and associated documents are  
10 available online at: <https://github.com/amcrisan/GEViTAnalysisRelease>

11  
12 Importantly, we use, analyze, and present figures from research articles under “Fair Use Terms”,  
13 which allows us to use copyrighted materials for research purposes. We make provisions to link  
14 back to the original work from which figures are extracted, and do not make any other materials  
15 available beyond the figures and article metadata data obtained from PubMed.

16  
17 **LITERATURE ANALYSIS**

18 Aspects of our literature analysis have, with some modification, been turned into an R package  
19 called Adjutant, which is available at <https://github.com/amcrisan/adjutant>. A pre-print  
20 for Adjutant is available online at  
21 <https://www.biorxiv.org/content/early/2018/03/27/290031> and describes the  
22 methodology we have used. We do not repeat that methodology in detail here, but we do  
23 describe it, and indicate where there are discrepancies between Adjutant’s final implementation,  
24 and this analysis.

25 **Search Terms.** We searched for articles related to infectious disease genomic epidemiology that  
26 were published within the past ten years. We used two queries, 1) (*genome AND (outbreak OR*  
27 *pandemic OR epidemic)*) OR "*genomic epidemiology*" and 2) (*genomic epidemiology*  
28 *OR molecular epidemiology*) AND (*bacteri\* OR vir\* OR pathogen*) AND *Genome*  
29 combined their results and retaining only unique records for further analysis.

30

31 **Data Preparation.** The document corpus included only PubMed IDs, year of publication,  
32 authors, article titles, article abstract, and associated Medical Subject Heading (MeSH) terms (if  
33 there were any). Titles and abstracts were decomposed into single terms, stemmed, and filtered  
34 as described in the Adjutant paper. We calculated the term frequency inverse document  
35 frequency (td-idf) metric each term, created a sparse Document Term Matrix (DTM) for further  
36 analysis. A separate dataset of bigram terms was also prepared but used only for purposes of  
37 linking articles to *a priori* concepts (see Main text).

38

39 **Unsupervised Clustering.** We used the t-SNE and hdbscan algorithms to perform an  
40 unsupervised clustering using the DTM. While numerous sources advise against clustering on t-  
41 SNE results we found that on large document corpuses this approach worked well as we verified  
42 with the validity checks described below. We used the Barnes-Hut implementation of t-SNE<sup>21</sup>,  
43 which allows for some acceleration at the cost of accuracy, with the perplexity parameter set to  
44 100 and otherwise default parameters of the R package implementation<sup>22</sup>. We then used  
45 hdbscan<sup>23</sup> on the t-SNE co-ordinate to derive the topic clusters. Clusters are sensitive to the  
46 minimum number of cluster points (minPts) parameter supplied to the hdbscan, and so we tried  
47 different minPts values (50, 75, 100, 125, 150, 250, 500, 1000), observing how the cluster  
48 compositions changed. We observed that some articles never held membership in any cluster



49 irrespective of the parameter settings and labelled those as “never clustered”, in contrast to  
50 articles that were simply not clustered with our specific final parameter settings that are labeled  
51 as “currently unclustered”. The final set of clusters are a blend of separate parameters (75 and  
52 150). The topic of each cluster is assigned by using the top two most frequent terms within each  
53 cluster. Upon observing the cluster results, we validated our clusters using an external list of  
54 human pathogens and assessed the correspondence between pathogen terms and cluster topics.

55  
56 **Linking To *A Priori* Concepts.** We used the dataset of bigrams and filtered out those that  
57 occurred in fewer than 10 articles within a cluster or fewer than 10% of bigrams across bigrams  
58 in the corpus. The remaining bigrams were mapped to a set of *a priori* defined concepts, except  
59 for bigrams excluded because they were common writing colloquialisms or could not be clearly  
60 mapped. This mapping was conducted through iterative internal discussions, in a similar spirit to  
61 the visualization analysis described below. We deemed this result acceptable for our analysis  
62 needs and did not attempt to further validate it.

63  
64 **Document Sampling.** We sampled one document for each *a priori* concept within each topic  
65 cluster. Each sampled article was examined and either considered acceptable for further analysis  
66 or rejected. Reasons for rejection included: article did not contain any figures (main reason); full  
67 text article not accessible; article not in English; article was mainly about a technique (i.e.  
68 laboratory technique or bioinformatics method); article did not include humans (animals only,  
69 which we considered out of scope); article was a systematic review (figures were mainly  
70 illustrations and not data visualizations). For each rejected article, we resampled two additional  
71 articles and chose only one article (assuming both were not rejected) for further analysis. Based

72 upon the analysis of the first round of sampling, the second round only sampled articles from  
73 2011 onwards to increase the chance of sampling articles containing figures, and also attempted  
74 to sample underrepresented *a priori* concepts from the first round. Table S3 contains a list of all  
75 the articles, which round they were sampled in, whether they were included or rejected, and the  
76 reason for rejection.

77

78 **Figure and Table Extraction.** To properly capture the figures and their captions, we manually  
79 extracted them from PDFs of the sampled articles. Images were only excluded if they were  
80 CONSORT diagrams, flow diagrams (excepted only if a data visualization was overlain) or were  
81 illustrations. We also included a small number of “missed opportunity” tables, which were stand-  
82 alone tables that we felt could have been visualized. This determination was subjective but  
83 included tables that were matrices of numbers or large tables of patient metadata where each row  
84 consisted of a patient (but demographic tables and statistical summaries were *not* considered  
85 missed opportunity tables).

86

## 87 **VISUALIZATION ANALYSIS**

88

89 **Figure Analysis.** We analyzed whole figures; we did not break them up into individual parts  
90 because we wanted to understand the potential interplay between subfigures. For example, if a  
91 paper contains three figures (Fig. 1, Fig. 2, and Fig. 3) each figure was analyzed separately,  
92 whereas if the third figure contains two parts (i.e. Fig. 3A, Fig 3B) those two parts were analyzed  
93 *together*.

94

95 We generated a descriptive mechanism using qualitative open and axial coding techniques that  
96 are routinely used within human-computer interaction (HCI) research<sup>24</sup>, which grew out of the  
97 Grounded Theory Method developed in the social science fields of sociology, psychology, and  
98 anthropology<sup>25</sup>. As we assume that many readers are quantitative researchers, we will briefly  
99 describe these techniques in more detail. Grounded Theory refers to a general set of methods  
100 used by qualitative researchers to inductively analyze and construct a theory about some  
101 phenomenon that is “grounded” in data<sup>24</sup>. In general terms, the idea of Grounded Theory is  
102 similar in spirit to unsupervised analysis methods that are applied in quantitative research<sup>26</sup> since  
103 both approaches rely on emergent pattern matching that is found within the data rather than  
104 applying a specific hypothesis or theory; in qualitative methods the human resolves the relevant  
105 patterns, in quantitative methods generally the algorithm does. Curating and labelling data is also  
106 standard practice for developing image-based machine learning training datasets and these  
107 approaches likely use qualitative techniques without referring to them. We have also found that  
108 qualitative research approaches are useful when trying to explore some data without any pre-  
109 conceived notions of what the outcomes should be.

110

111 The core foundation of Grounded Theory Methods (GTM) rests upon different approaches for  
112 assigning descriptive codes to data, typically chunks of text, that become the basis for further  
113 analysis<sup>25</sup>. Two widely used approaches are open and axial coding, the latter allowing a  
114 researcher to develop hierarchical relationships between codes. Codes are subjectively assigned  
115 to data and refined over multiple rounds of data interrogation until a final set of descriptive codes  
116 are agreed upon. Notions of validity and generalizability within qualitative research are different  
117 than within quantitative research, but there is a notion of at least internal validity for qualitative

118 research and some agreed upon conventions to assess the robustness of the work (see Maxwell<sup>27</sup>,  
119 Chapter 6), which we have applied in our own research.

120

121 We note that the application of GTM is different between the social sciences and HCI, with one  
122 large difference being that HCI and information visualization (infovis) researchers frequently  
123 apply GTM to text<sup>28</sup>, video, and image data<sup>29</sup> whereas social scientists tend to primarily use  
124 interview text (although some examples of image analysis with social sciences exist<sup>30</sup>). Our  
125 application of GTM, and especially open and axial coding, is drawn from the HCI infovis  
126 research traditions, and we also build upon established terminology and ideas from Munzner's  
127 Visualization Analysis and Design<sup>15</sup>. We ourselves are primarily quantitative researchers and  
128 thus further apply a specific interrogative lens to the way we use GTM. There exists a fascinating  
129 and broader discussion about mixed methods approaches to augment the best properties of both  
130 qualitative and quantitative research methods<sup>31</sup>, which is beyond the application of this work but  
131 that the reader should be aware of.

132

133

## 134 REFERENCES

135

- 136 21. van der Maaten, L. Accelerating t-SNE using Tree-Based Algorithms. *J. Mach. Learn. Res.* **15**,  
137 3221–3245 (2014).
- 138 22. Krijthe, J. H. Rtsne: T-Distributed Stochastic Neighbor Embedding using a Barnes-Hut  
139 Implementation. (2015). url: <https://github.com/jkrijthe/Rtsne>
- 140 23. Campello, R. J. G. B., Moulavi, D. & Sander, J. Density-Based Clustering Based on Hierarchical  
141 Density Estimates. *Adv. Knowl. Discov. Data Min.* 160–172 (2013). doi:10.1007/978-3-642-  
142 37456-2\_14
- 143 24. Jacko, J. A. *Human-Computer Interaction Handbook: Fundamentals, Evolving Technologies, and*  
144 *Emerging Applications, Third Edition*. (CRC Press, Inc., 2012).
- 145 25. Charmaz, K. *Constructing grounded theory: a practical guide through qualitative analysis*. (Sage,  
146 2006).
- 147 26. Muller, M., Guha, S., Baumer, E. P. S., Mimno, D. & Shami, N. S. Machine Learning and  
148 Grounded Theory Method: Convergence, Divergence, and Combination. *Proc. Gr.* 0–6 (2016).  
149 doi:10.1145/2957276.2957280

- 150 27. Maxwell, J. A. *Qualitative Research Design: An Interactive Approach*. *Applied social research*  
151 *methods series* **41**, (2013).
- 152 28. Furniss, D., Blandford, A. & Curzon, P. Confessions from a grounded theory PhD: Experiences  
153 and lesson learnt. *Proceedings of the SIGCHI Conference on Human Factors in Computing*  
154 *Systems (CHI'11)*(2011).
- 155 29. Sedlmair, M., Munzner, T. & Tory, M. Empirical Guidance on Scatterplot and Dimension  
156 Reduction Technique Choices. *IEEE Trans. Vis. Comput. Graph.* **19**, 2634–2643 (2013).
- 157 30. Liebenberg, L., Didkowsky, N. & Ungar, M. Analysing image-based data using grounded theory:  
158 the Negotiating Resilience Project. *Vis. Stud.* **27**, 59–74 (2012).
- 159 31. Creswell, J. W. & Piano, V. L. Designing and Conducting Mixed Methods Research. *Aust. N. Z. J.*  
160 *Public Health* **31**, 388–388 (2007).
- 161

Supplemental Material for

**A method for systematically surveying data visualizations  
in infectious disease genomic epidemiology**

Anamaria Crisan, Jennifer Gardy, and Tamara Munzner

**Contents**

- 1. Supplemental Figure S1 to S5
- 2. Supplemental Table S1 to S3 Captions

A reminder that analysis notebooks are also available at:  
<https://github.com/amcrisan/GEViTAnalysisRelease>

**Supplemental Figures**

**Figure S1 Overview of our approach to construct a visualization design space.** This approach is split into two distinct, but connected phases, consisting of a literature analysis and followed by a visualization analysis phase that itself consists of a qualitative and quantitative analysis component. We overlay these phases as concrete steps in resolving our primary research objective, which is stated below.

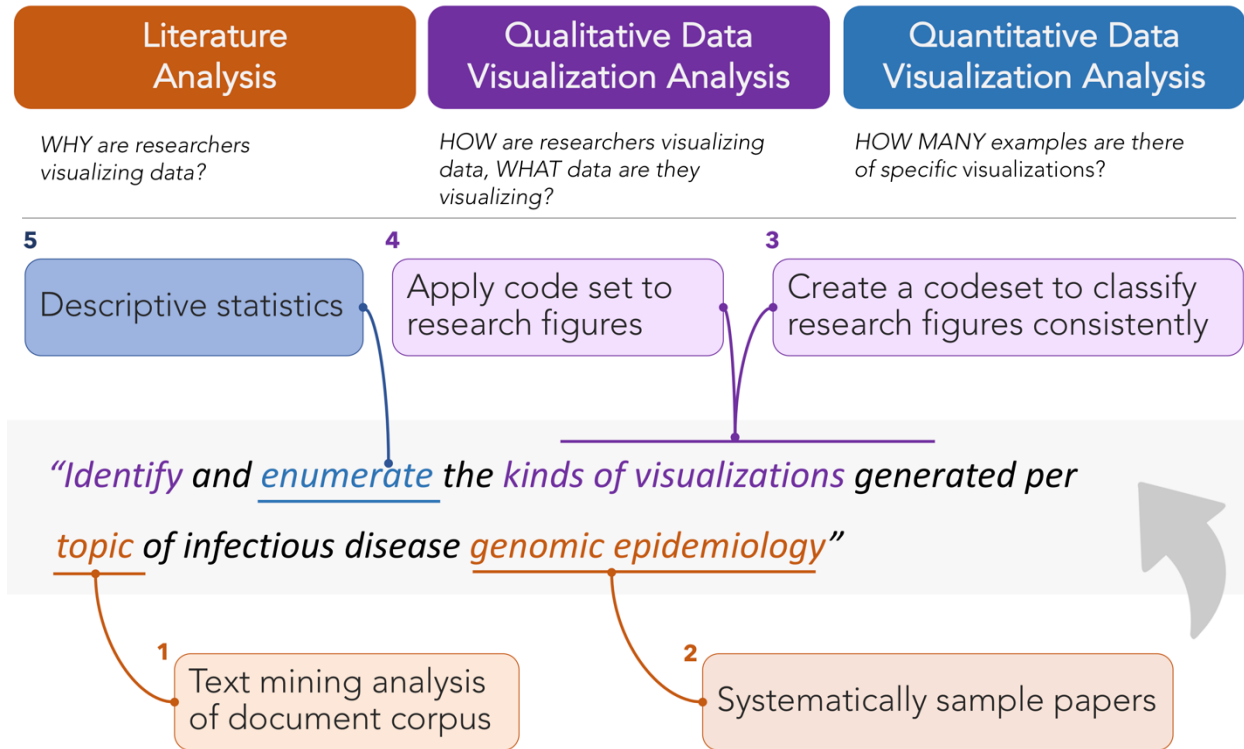

**Figure S2 Literature Mining Methods.**

| Approach | Literature Search                               | Data Clean-up                                                                                               | Unsupervised Clustering                                                                                  | Identifying Cross-Cutting Topics                                   | Sampling                                                                                                                   |
|----------|-------------------------------------------------|-------------------------------------------------------------------------------------------------------------|----------------------------------------------------------------------------------------------------------|--------------------------------------------------------------------|----------------------------------------------------------------------------------------------------------------------------|
| Data     | Pubmed Central<br><i>Titles &amp; Abstracts</i> | Document corpus                                                                                             | Tidyttext corpus,<br>Document term matrix                                                                | Tidyttext corpus<br>Document corpus                                | Document corpus                                                                                                            |
| Methods  | Query Pubmed<br>through R                       | Extract 1-gram,<br>Remove stop words,<br>Remove numbers,<br>remove common words,<br>Calculate td_idf metric | rTSNE, hdbscan (search<br>for optimal hbscan<br>params)<br><br>Name clusters by two<br>most common names | Manual<br>annotations                                              | Sample per topic<br>(per pathogen,<br>see results)<br><br>Manually assess<br>appropriateness,<br>re-sample for<br>rejected |
| Packages | risemed,<br>parseJSON                           | tidyttext, snowballC,<br>dplyr, Stringr                                                                     | rTSNE, hdbscan                                                                                           | -                                                                  | -                                                                                                                          |
| Output   | Document corpus                                 | Tidyttext corpus,<br>Document term matrix                                                                   | add cluster to<br>document corpus<br><br>[a result]                                                      | add cross-cutting<br>topic to document<br>corpus<br><br>[a result] | Sampled<br>document corpus<br>Spreadsheet<br>keep/reject (reason)                                                          |

**Figure S3 Qualitative and Quantitative Visualization Analysis Methods.**

| Approach | Figure Extraction<br>(including captions)                                                                          | Axial Coding                                                                                   | Gallery Development                                              | Quantitative Analysis                                     |
|----------|--------------------------------------------------------------------------------------------------------------------|------------------------------------------------------------------------------------------------|------------------------------------------------------------------|-----------------------------------------------------------|
| Data     | Sampled<br>Document Corpus<br><i>+ some manual additions</i>                                                       | Figure (and table)<br>corpus                                                                   | Sampled Document<br>Corpus<br>Figure & Tables<br>Code set        | Sampled Document Corpus<br><br>Annotated Figures & Tables |
| Methods  | Manual extract<br>figures & some<br>tables from PDF<br><br>Optical character<br>recognition for figure<br>captions | Manual, lots of<br>group discussion and<br>iterative refinement                                | Prototype<br>development                                         | Univariate &<br>Bivariate<br>Descriptive<br>Statistics    |
| Packages | tesseract                                                                                                          | -                                                                                              | shiny                                                            | dplyr; ggplot                                             |
| Output   | Figures & some<br>tables with<br>captions as text                                                                  | Code set for: basic chart<br>types, chart<br>combinations, and chart<br>annotations [a result] | Annotated Figures<br>& Tables<br>Browseable gallery<br>[results] | Descriptive<br>Statistics<br><br>[a result]               |

**Figure S4** *A priori* concepts distributed among pathogens (a) and the number to bigram assigned to each concept (b).

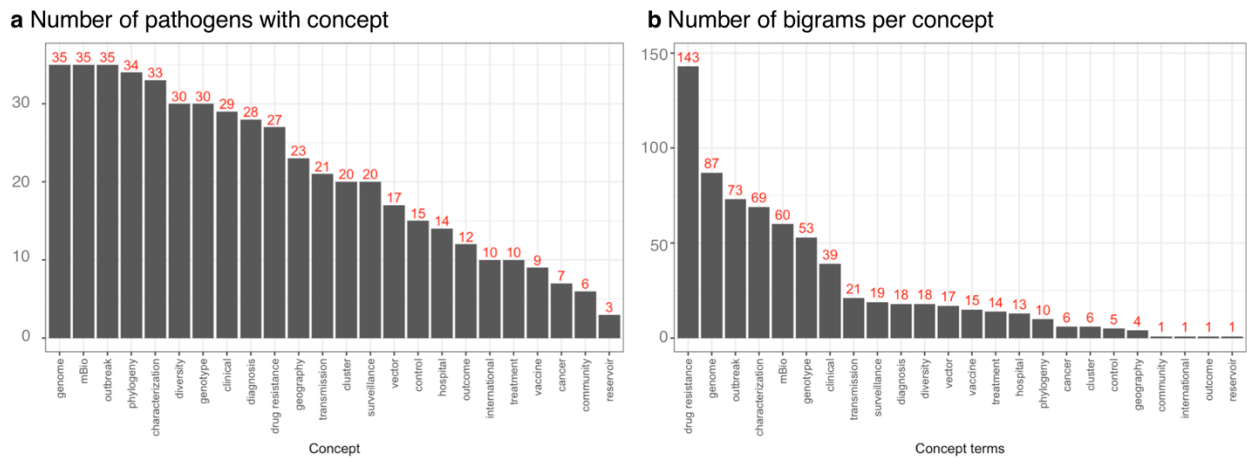

**Figure S5** Distribution of chart types of chart type across articles (a) and the co-occurrence of chart types with figures (b)

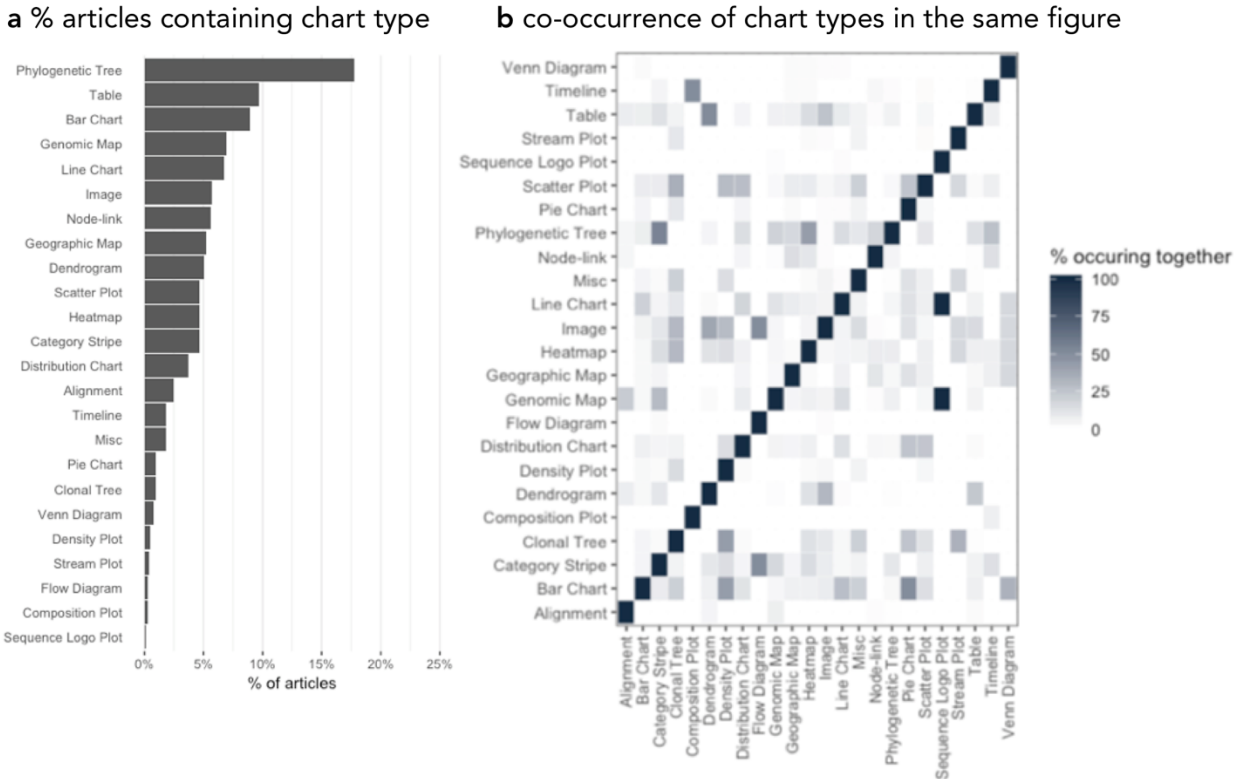



## **Supplemental Table Captions**

**Table S1 External list of pathogens.** A list of human pathogens and their associated disease taken from Wikipedia ([https://en.wikipedia.org/wiki/List\\_of\\_infectious\\_diseases](https://en.wikipedia.org/wiki/List_of_infectious_diseases)) and used to validate the topic clustering by assessing whether the pathogen strings occur in clusters with the same name. Both the disease and the source of the disease were checked for a match within each document.

**Table S2 Mapping of bigrams to concepts.**

**Table S3 Master list of sampled articles.**
